# Supplementary material for: Immune-Related Molecules CD3G and FERMT3: Novel Biomarkers Associated with Sepsis
Source: MDPI journal article supplement (doi:10.3390/ijms25020749), 2024-01-06

## Supplementary Material

Figure S1: The HE staining of tissues in the sham and CLP groups at 10 days. (A) The lung tissues of the CLP group exhibited a significant infiltration of lymphocytes and neutrophils, (B) Hepatocellular degeneration surrounding liver blood vessels is observed in multiple areas, (C) Minor venous congestion and dilation were observed in kidney.

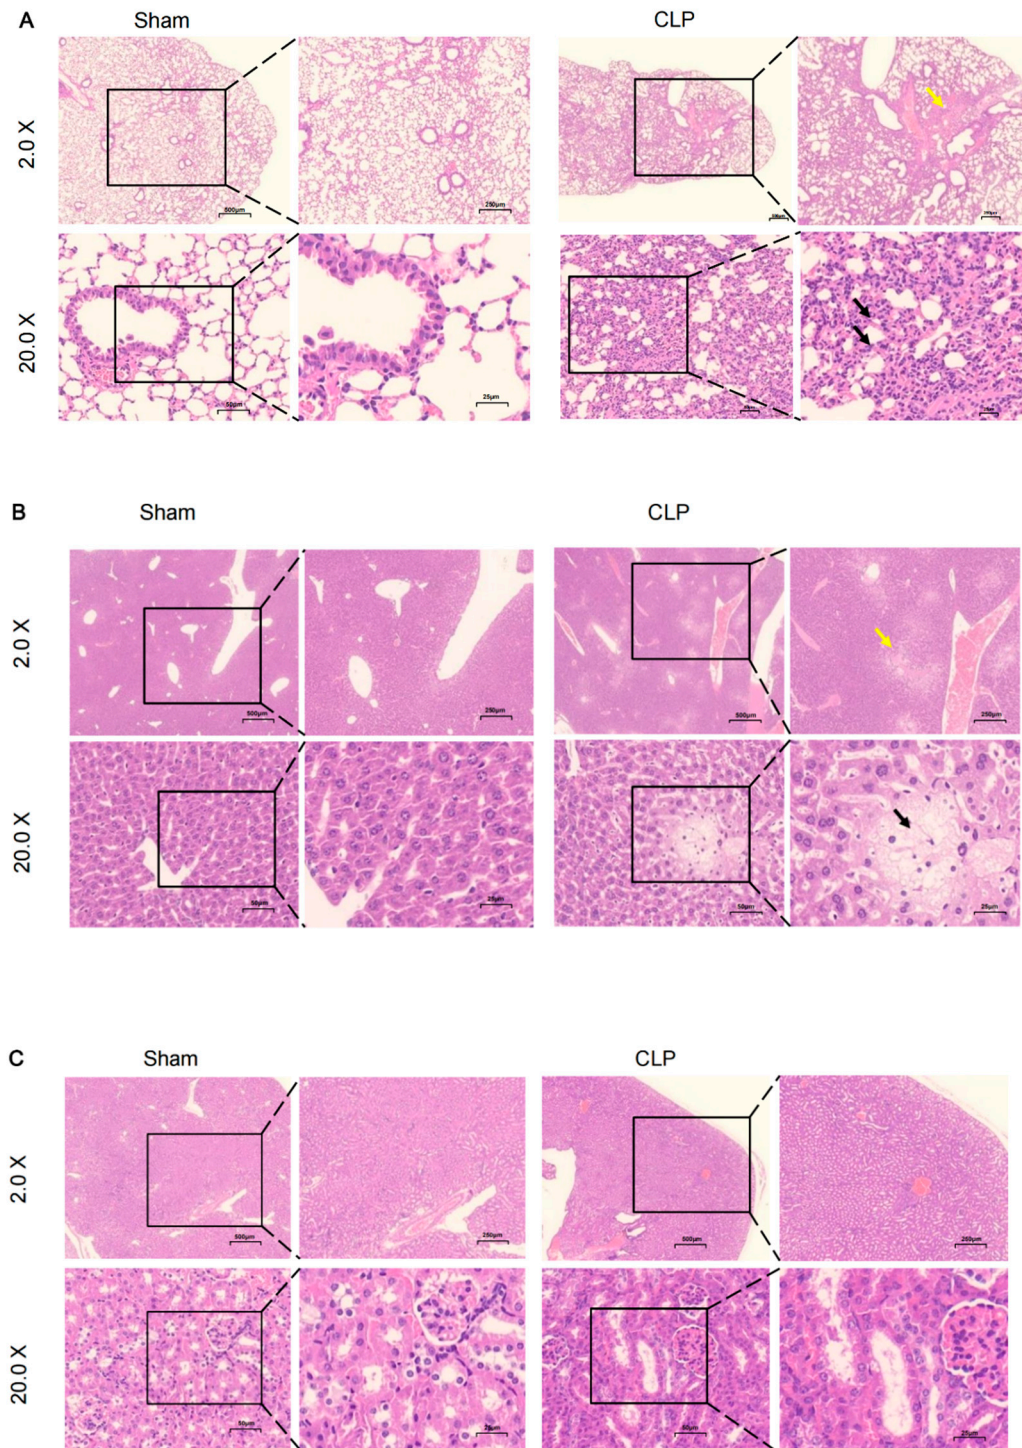

Figure S2: The heat map of top ten up-regulated and down-regulated genes, respectively.

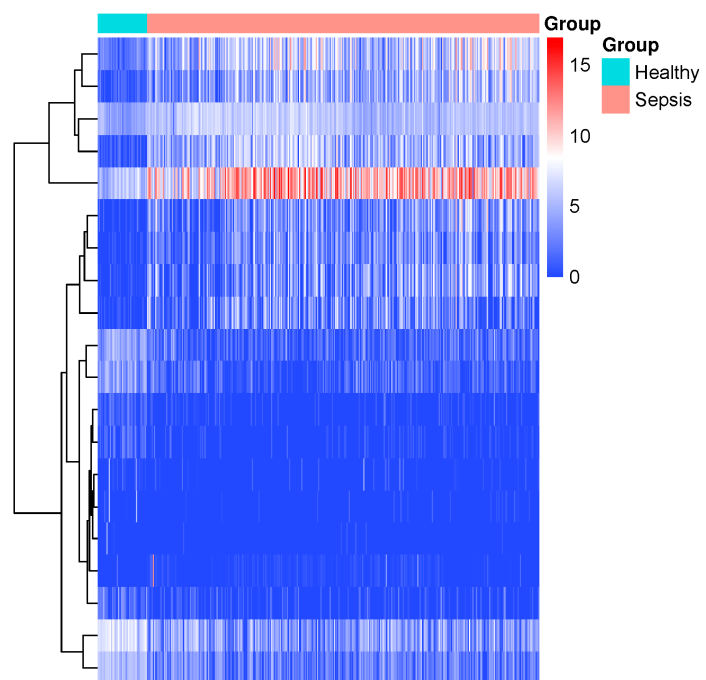

Supplement: s1 [file s1]
